# Supplementary material for: Equine tendonitis therapy using mesenchymal stem cells and platelet concentrates: a randomized controlled trial
Source: Springer Nature journal article supplement (doi:10.1186/scrt236), 2013-07-22

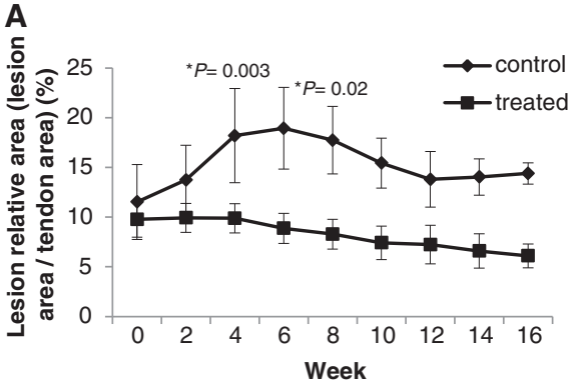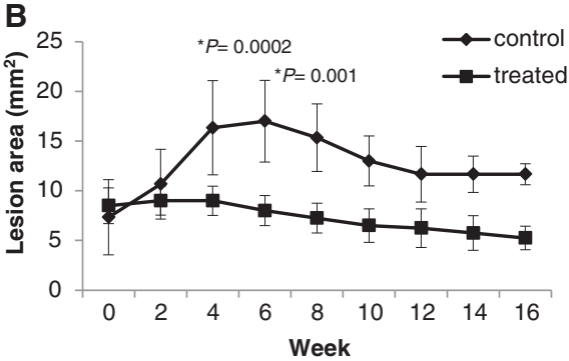

Supplement: 13287_2013_233_MOESM6_ESM.pdf [file 13287_2013_233_MOESM6_ESM.pdf]
